# Supplementary material
Source: PubMed Central journal article supplement (PMC4307422)
Supplement: ijcem0007-4787-f7.pdf [file ijcem0007-4787-f7.pdf]

## IL1RAP is related to CML clinical phase

**Table S1.** The detailed information of CML patients

| Sample | Phase | Patient | Sex | Age | Treatment           | Blood test (10 <sup>9</sup> /L) |       |     |      |      | BCR-ABL | IL1RAP + cell% |            |            | Karyotype                                   |
|--------|-------|---------|-----|-----|---------------------|---------------------------------|-------|-----|------|------|---------|----------------|------------|------------|---------------------------------------------|
|        |       |         |     |     |                     | WBC                             | NE    | LY  | RBC  | PLT  |         | CD34+          | CD34+CD38- | CD34+CD38+ |                                             |
| PB     | CP    | 1       | M   | 40  | hydroxyurea         | 91.01                           | 0     | 8.8 | 4.99 | 217  | +       | 0              | 7.09       | 0          | T (9; 22) (q34; q11)                        |
| PB     | CP    | 2       | M   | 40  | hydroxyurea         | 15.21                           | 9.33  | 3.3 | 4.64 | 220  | No Det. | 0              | 16.13      | 3.97       | No Det.                                     |
| PB     | CP    | 3       | M   | 40  | hydroxyurea         | 3.61                            | 1.64  | 1.6 | 4.02 | 127  | No Det. | 10.84          | 24.73      | 53.38      | No Det.                                     |
| PB     | CP    | 4       | F   | 29  | hydroxyurea         | 1.67                            | 0.44  | 0.7 | 2.93 | 416  | +       | 32.59          | 49.17      | 77.98      | No Det.                                     |
| PB     | CP    | 5       | F   | 29  | hydroxyurea         | 4.58                            | 1.77  | 1   | 3.05 | 1303 | +       | 51.31          | 32.48      | 95.65      | No Det.                                     |
| PB     | CP    | 6       | M   | 49  | hydroxyurea         | 208.29                          | 0     | 0   | 3.01 | 340  | No Det. | 36.82          | 40.32      | 38.59      | No Det.                                     |
| PB     | CP    | 7       | M   | 50  | TKI                 | 3.7                             | 2.93  | 0.7 | 2.32 | 98   | No Det. | 11.86          | 24.02      | 39.44      | No Det.                                     |
| PB     | CP    | 8       | M   | 24  | hydroxyurea         | 56.48                           | -     | -   | 3.87 | 124  | No Det. | 70.83          | 87.28      | 84.4       | No Det.                                     |
| PB     | CP    | 9       | M   | 25  | HSCT                | 3.91                            | 2.45  | 1.2 | 3.18 | 89   | +       | 7.63           | 56.47      | 82.74      | 46, XY, t (9; 22)                           |
| PB     | CP    | 10      | M   | 48  | hydroxyurea         | 19.34                           | 0     | 0   | 3.59 | 491  | No Det. | 51.87          | 49.65      | 68.34      | No Det.                                     |
| PB     | CP    | 11      | M   | 58  | hydroxyurea         | 152.85                          | -     | -   | 2.97 | 489  | +       | 85.89          | 23.68      | 85.3       | 46, XY, t (9; 22) [5]                       |
| PB     | CP    | 12      | F   | 58  | hydroxyurea         | 181.84                          | 0     | 0   | 3.26 | 702  | -       | 53.36          | 39.15      | 45.1       | 46, XX [5]                                  |
| PB     | CP    | 13      | M   | 22  | hydroxyurea         | 18.59                           | 13.08 | 3.2 | 5.09 | 1463 | No Det. | 26.19          | 27.63      | 53.14      | No Det.                                     |
| PB     | CP    | 14      | M   | 22  | TKI                 | 9.89                            | 6.37  | 2.3 | 4.78 | 889  | +       | 9.45           | 17.57      | 69.44      | 46, XY, t (9; 22) [5]                       |
| PB     | CP    | 15      | M   | 60  | IFN                 | 61.93                           | 0     | 3.8 | 6.06 | 406  | No Det. | 67.57          | 86.25      | 74.81      | 46, XX [6]                                  |
| PB     | CP    | 16      | M   | 60  | hydroxyurea         | 20.67                           | 18.17 | 1.5 | 5.6  | 115  | No Det. | 44.85          | 81.68      | 66.51      | No Det.                                     |
| PB     | CP    | 17      | F   | 43  | HSCT                | -                               | -     | -   | -    | -    | No Det. | 5.43           | 14.97      | 82.85      | No Det.                                     |
| PB     | CP    | 18      | M   | 39  | hydroxyurea         | 202.13                          | 0     | 0   | 3.69 | 182  | +       | 63.91          | 79.25      | 78.12      | 46, XY, t (9; 22) [10]                      |
| PB     | CP    | 19      | F   | 34  | HSCT                | 3.17                            | 1.89  | 0.8 | 2.7  | 89   | No Det. | 3.37           | 4.96       | 35.47      | No Det.                                     |
| PB     | CP    | 20      | F   | 34  | HSCT                | 6.56                            | 4.36  | 1.5 | 3.31 | 185  | -       | 2.53           | 0.56       | 93.94      | 46, XY [20]                                 |
| PB     | CP    | 21      | M   | 51  | TKI                 | 4.15                            | 2.16  | 1.6 | 4.19 | 137  | +       | 1.23           | 3.34       | 66.48      | 46, XX [11]                                 |
| PB     | CP    | 22      | F   | 50  | hydroxyurea         | 68.99                           | 60.5  | 3.6 | 2.79 | 1159 | +       | 21.14          | 18.04      | 45.87      | No Det.                                     |
| PB     | CP    | 23      | M   | 34  | TKI                 | 4.84                            | 2.06  | 2.2 | 4.23 | 137  | No Det. | 28.4           | 67.83      | 50.24      | 46, XY, t (9; 22) (q34; q11) [2]/46, XY [8] |
| PB     | CP    | 24      | M   | 68  | TKI                 | 4.28                            | 1.84  | 1.9 | 3.53 | 144  | +       | 27.06          | 68.19      | 57.68      | No Det.                                     |
| PB     | CP    | 25      | M   | 47  | hydroxyurea         | 8.47                            | 5.68  | 2.3 | 4.08 | 191  | No Det. | 0              | 4.48       | 90.61      | 46, XY, t (9; 22) (q34; q11) [2]            |
| PB     | CP    | 26      | M   | 41  | hydroxyurea         | 29.47                           | 26.41 | 1.4 | 4.11 | 385  | +       | 9.16           | 25.66      | 67.56      | 46, XY, t (9; 22) [6]                       |
| PB     | CP    | 27      | F   | 38  | hydroxyurea         | 25.92                           | 19.16 | 3.2 | 3.59 | 1158 | No Det. | 10             | 14         | 53.57      | No Det.                                     |
| PB     | CP    | 28      | F   | 24  | hydroxyurea         | 52.08                           | 43.95 | 5.5 | 4.24 | 592  | +       | 10.12          | 9.81       | 37.72      | 46, XX, t (9; 22) [10]                      |
| PB     | CP    | 29      | M   | 58  | hydroxyurea         | 365.46                          | -     | -   | 3.26 | 227  | No Det. | 27.95          | 30.57      | 7.31       | 46, XY, t (9; 22) (q34; q11) [10]           |
| PB     | CP    | 30      | M   | 65  | IFN and hydroxyurea | 82.13                           | -     | -   | 3.68 | 510  | -       | 65.05          | 46.58      | 36.04      | No Det.                                     |
| PB     | CP    | 31      | M   | 22  | TKI                 | 249.6                           | -     | -   | 2.67 | 88   | +       | 40.4           | 38.79      | 60.32      | No Det.                                     |
| PB     | CP    | 32      | M   | 22  | TKI                 | 5.99                            | 4.61  | 1.1 | 4.03 | 176  | No Det. | 1.04           | 27.47      | 81.92      | No Det.                                     |
| PB     | CP    | 33      | M   | 24  | TKI                 | 6                               | 3.01  | 2.6 | 4.54 | 158  | No Det. | 1.64           | 0.27       | 38.88      | No Det.                                     |
| PB     | CP    | 34      | M   | 42  | hydroxyurea         | 130.79                          | -     | 6.1 | 3.91 | 364  | +       | 15.65          | 59.2       | 78.89      | 46, XY, t (9; 22) [10]                      |
| PB     | CP    | 35      | M   | 37  | TKI                 | 4.44                            | 2.93  | 1   | 3.27 | 154  | No Det. | 30             | 38.64      | 78.83      | No Det.                                     |
| PB     | CP    | 36      | M   | 35  | TKI                 | 2.02                            | 1.22  | 0.5 | 3.13 | 56   | No Det. | 1.72           | 3.01       | 35.86      | No Det.                                     |
| PB     | CP    | 37      | F   | 48  | hydroxyurea         | 357.77                          | □     | □   | 2.7  | 454  | +       | 65.72          | 27.59      | 21.16      | 46, XX, t (9; 22) (q34; q11) [10]           |

## IL1RAP is related to CML clinical phase

|    |    |    |   |    |                          |        |       |      |      |      |         |       |       |       |                                                                                                        |
|----|----|----|---|----|--------------------------|--------|-------|------|------|------|---------|-------|-------|-------|--------------------------------------------------------------------------------------------------------|
| PB | CP | 38 | M | 51 | TKI                      | 6.33   | 3.53  | 2.3  | 4.44 | 178  | -       | 0.84  | 6.89  | 26.42 | 46, XY, [3]                                                                                            |
| PB | CP | 39 | M | 72 | hydroxyurea              | 118.03 | -     | -    | 3.99 | 427  | +       | 59.2  | 29.13 | 33.21 | 46, XY, t (9; 22) (q34; q11) [10]                                                                      |
| PB | CP | 40 | F | 68 | hydroxyurea              | 4.3    | 3.3   | 0.8  | 0.98 | 37   | -       | 1.43  | 8.5   | 17.84 | 46, XX [20]                                                                                            |
| PB | CP | 41 | F | 88 | hydroxyurea              | 80.11  | -     | -    | 3    | 324  | -       | 48.72 | 39.22 | 66.58 | 46, XX, add (5) (q35), del (6) (p22), del (3) (?q14) [8]/46XX [2]                                      |
| PB | CP | 42 | F | 40 | hydroxyurea              | 82.53  | 72.98 | 4.5  | 3.88 | 1041 | +       | 51.18 | 38.44 | 53.99 | No Det.                                                                                                |
| PB | CP | 43 | F | 44 | leukapheresis            | 197.65 | -     | -    | 3.38 | 608  | +       | 51.92 | 27.89 | 61.64 | 46, XX, t (9; 22) (q34; q11) [10]                                                                      |
| PB | CP | 44 | F | 11 | TKI                      | 6.87   | 3.15  | 3.3  | 4    | 165  | +       | 7.39  | 17.63 | 83.95 | 46, XX, t (9; 22) (q34; q11) [4]/46, XX [16]                                                           |
| PB | CP | 45 | F | 46 | hydroxyurea              | 505.6  | 0     | 0    | 1.74 | 314  | +       | 21.54 | 90.95 | 1.47  | No Det.                                                                                                |
| PB | CP | 46 | M | 8  | HSCT                     | 5.6    | 3.66  | 1.4  | 3.46 | 240  | No Det. | 24.62 | 2.9   | 4.04  | No Det.                                                                                                |
| PB | CP | 47 | F | 28 | TKI                      | 17.9   | 0     | 2.9  | 1.79 | 276  | No Det. | 14.49 | 10.54 | 37.51 | No Det.                                                                                                |
| PB | CP | 48 | M | 22 | IFN                      | 4.76   | 2.96  | 1.4  | 4.55 | 213  | +       | 9.87  | 10.31 | 39.71 | 46, XY, t (9; 22) [6]/46, XY [16]                                                                      |
| PB | CP | 49 | M | 50 | leukapheresis            | 7.82   | 6.77  | 0.5  | 3.6  | 334  | +       | 0.78  | 6.7   | 84.29 | 46, XY, der (1) t (1; 8) (q43; q13), der (3), del (6) (p23), del (8) (q11), t (9; 22) [3]              |
| PB | CP | 50 | M | 58 | hydroxyurea              | 146.4  | 0     | 10.1 | 2.73 | 1791 | No Det. | 19.51 | 11.32 | 82.77 | No Det.                                                                                                |
| PB | CP | 51 | F | 63 | hydroxyurea              | 4.8    | 3.61  | 0.7  | 3.4  | 280  | No Det. | 2.21  | 10.82 | 55.95 | No Det.                                                                                                |
| PB | AP | 52 | M | 50 | TKI                      | 23.6   | 0     | 0    | 3.31 | 92   | +       | 57.1  | 88.11 | 30.39 | No Det.                                                                                                |
| PB | AP | 53 | M | 31 | TKI                      | 13.29  | -     | -    | 2.96 | 163  | +       | 95.82 | 95    | 98.4  | 45, XY, -7, t (9; 22) [10]                                                                             |
| PB | AP | 54 | M | 51 | TKI                      | 29.25  | -     | -    | 0.85 | 785  | +       | 62.12 | 71.86 | 93.05 | 46, XY, t (9; 22) (q34; q11) [8]/46; idem, -1, der (11) t (1; 11) (p32; q23), del (12) (q21), +mar [2] |
| PB | AP | 55 | M | 23 | TKI                      | 24.28  | □     | □    | 5.57 | 22   | +       | 96.55 | 82.23 | 85.26 | No Det.                                                                                                |
| PB | AP | 56 | M | 23 | TKI                      | 5.87   | 1.39  | 3.9  | 5.31 | 12   | No Det. | 48.31 | 55.93 | 41.02 | No Det.                                                                                                |
| PB | AP | 57 | M | 25 | TKI                      | 321.89 | 0     | 0    | 2.04 | 17   | No Det. | 95.67 | 92.11 | 92.77 | No Det.                                                                                                |
| PB | AP | 58 | M | 52 | hydroxyurea              | 66.8   | 0     | 0    | 1.88 | 289  | +       | 93.3  | 93.64 | 93.08 | No Det.                                                                                                |
| PB | BP | 59 | M | 31 | TKI                      | 12.24  | 0     | 0    | 2    | 84   | No Det. | 95.85 | 97.13 | 99.53 | No Det.                                                                                                |
| PB | BP | 60 | M | 23 | TKI                      | 10.76  | 0     | 0    | 3.69 | 67   | +       | 84.73 | 91.79 | 75.9  | No Det.                                                                                                |
| PB | BP | 61 | M | 55 | TKI                      | 9.97   | -     | -    | 1.57 | 321  | +       | 80.87 | 73.71 | 74.97 | 46, XY, t (3; 3) (q21; q26), -7, t (9; 22), +mar [inc4]                                                |
| PB | BP | 62 | M | 55 | TKI                      | 5.19   | 0.91  | 2.4  | 2.37 | 21   | +       | 36.67 | 30.49 | 8.42  | No Det.                                                                                                |
| PB | BP | 63 | M | 34 | anti-infective treatment | 52.45  | 0     | 0    | 2.37 | 20   | +       | 96.52 | 86.02 | 99.65 | 54, XY, +Y, +4, +8 t (9; 22), +15, +19, +19, +21, +ph [CP10]                                           |
| PB | BP | 64 | M | 18 | TKI                      | 122.45 | -     | -    | 2.78 | 14   | +       | 20.78 | 10.83 | 10.17 | 45, XY, dic (7; 9) (p11; p11), t (9; 22) [6]/46, idem, +ph (4)                                         |
| PB | BP | 65 | F | 26 | hydroxyurea              | 250.8  | □     | □    | 3.62 | 309  | No Det. | 1.3   | 88.36 | 16.41 | No Det.                                                                                                |
| BM | CP | 5  | F | 29 | hydroxyurea              | 4.58   | 1.77  | 1    | 3.05 | 1303 | No Det. | 27.68 | 21.14 | 85.17 | No Det.                                                                                                |
| BM | CP | 9  | M | 25 | HSCT                     | 3.91   | 2.45  | 1.2  | 3.18 | 89   | +       | 3.23  | 21.91 | 4.12  | 46, XY, t (9; 22)                                                                                      |
| BM | CP | 10 | M | 48 | hydroxyurea              | 106.57 | 0     | 0    | 3.52 | 307  | No Det. | 79.88 | 24.84 | 84.26 | 46, XY, t (9; 22) [1]                                                                                  |
| BM | CP | 18 | M | 39 | hydroxyurea              | 202.13 | 0     | 0    | 3.69 | 182  | +       | 40.15 | 64.66 | 83.29 | 46, XY, t (9; 22) [10]                                                                                 |
| BM | CP | 22 | F | 50 | hydroxyurea              | 68.99  | 60.5  | 3.6  | 2.79 | 1159 | +       | 12.43 | 13.66 | 22.09 | No Det.                                                                                                |
| BM | CP | 25 | M | 41 | hydroxyurea              | 29.47  | 26.41 | 1.4  | 4.11 | 385  | +       | 15.3  | 18.44 | 26.51 | 46, XY, t (9; 22) [6]                                                                                  |

### IL1RAP is related to CML clinical phase

|    |    |    |   |    |                          |        |       |      |      |      |         |       |       |        |                                                                                                 |
|----|----|----|---|----|--------------------------|--------|-------|------|------|------|---------|-------|-------|--------|-------------------------------------------------------------------------------------------------|
| BM | CP | 30 | M | 65 | IFN and hydroxyurea      | 82.13  | -     | -    | 3.68 | 510  | -       | 54.55 | 65.36 | 36.79  | No Det.                                                                                         |
| BM | CP | 66 | M | 24 | TKI                      | 4.4    | 2.32  | 1.8  | 4.35 | 150  | No Det. | 10.54 | 23.79 | -35.28 | 46, XY, t (9; 22) [8]/46, XY [2]                                                                |
| BM | CP | 33 | M | 24 | TKI                      | 6      | 3.01  | 2.6  | 4.54 | 158  | No Det. | 4.55  | 12.66 | 45.11  | No Det.                                                                                         |
| BM | CP | 34 | M | 42 | hydroxyurea              | 130.79 | -     | 6.1  | 3.91 | 364  | +       | 33.06 | 53.24 | 62.24  | 46, XY, t (9; 22) [10]                                                                          |
| BM | CP | 35 | M | 37 | TKI                      | 4.44   | 2.93  | 1    | 3.27 | 154  | No Det. | 19.96 | 21.35 | 35.08  | No Det.                                                                                         |
| BM | CP | 37 | F | 48 | hydroxyurea              | 357.77 | -     | -    | 2.7  | 454  | +       | 66.55 | 8.71  | 16.89  | 46, XX, t (9; 22) (q34; q11) [10]                                                               |
| BM | CP | 39 | M | 72 | hydroxyurea              | 118.03 | -     | -    | 3.99 | 427  | +       | 54.2  | 20.92 | 34.5   | 46, XY, t (9; 22) (q34; q11) [10]                                                               |
| BM | CP | 40 | F | 68 | hydroxyurea              | 4.3    | 3.3   | 0.8  | 0.98 | 37   | -       | 2.9   | 12.26 | 74.89  | 46, XX [20]                                                                                     |
| BM | CP | 42 | F | 40 | hydroxyurea              | 82.53  | 72.98 | 4.5  | 3.88 | 1041 | +       | 25.13 | 23.07 | 45.46  | No Det.                                                                                         |
| BM | CP | 51 | F | 63 | hydroxyurea              | 4.8    | 3.61  | 0.7  | 3.4  | 280  | □       | 4.09  | 9.13  | 48.86  | No Det.                                                                                         |
| BM | CP | 48 | M | 22 | IFN                      | 4.76   | 2.96  | 1.4  | 4.55 | 213  | +       | 4.23  | 13.01 | 5.41   | 46,XY,t (9; 22) [6]/46, XY [16]                                                                 |
| BM | CP | 49 | M | 50 | leukapheresis            | 7.82   | 6.77  | 0.5  | 3.6  | 334  | +       | 14.45 | 16.45 | 18.49  | 46, XY, der (1) t (1; 8) (q43; q13),<br>der (3), del (6) (p23), del (8) (q11),<br>t (9; 22) [3] |
| BM | CP | 50 | M | 58 | hydroxyurea              | 146.4  | 0     | 10.1 | 2.73 | 1791 | No Det. | 36.72 | 32.73 | 47.68  | No Det.                                                                                         |
| BM | AP | 67 | M | 50 | TKI                      | 5.35   | 0     | 0    | 2.49 | 53   | No Det. | 67.07 | 76.74 | 83.38  | No Det.                                                                                         |
| BM | BP | 63 | M | 34 | anti-infective treatment | 15.08  | -     | -    | 2.79 | 34   | +       | 98.29 | 97.41 | 99.51  | 54, XY, +Y, +4, +8, t (9; 22), +15,<br>+19, +19, +21, +ph [CP10]                                |
| BM | BP | 65 | F | 26 | hydroxyurea              | 250.8  | -     | -    | 3.62 | 309  | No Det. | 73.41 | 65.89 | 38.28  | No Det.                                                                                         |
